# Supplementary material for: Epigenetic Control of the foxp3 Locus in Regulatory T Cells
Source: PLOS journal article supplement (doi:10.1371/journal.pbio.0050038), 2007-01-26
Supplement: S1 (10.1371/journal.pbio.0050038.s001) [file journal.pbio.0050038.s001]

Supplementary Table

| amplicon<br>(CpG position) | ex vivo periphery |        |                   |        | ex vivo thymus    |        |                   |        |      |      | in vitro |              |        |
|----------------------------|-------------------|--------|-------------------|--------|-------------------|--------|-------------------|--------|------|------|----------|--------------|--------|
|                            |                   |        |                   |        | CD4 SP            |        |                   |        | DP   | DN   |          |              |        |
|                            | CD25 <sup>-</sup> |        | CD25 <sup>+</sup> |        | CD25 <sup>-</sup> |        | CD25 <sup>+</sup> |        |      |      | Th1      | TGF- $\beta$ |        |
|                            | exp. 1            | exp. 2 |      |      |          | exp. 1       | exp. 2 |
| 1 (158)                    | 100               | 100    | 4,5               | 0      | 100               | 100    | 29                | 44     | 100  | 100  | 100      | 100          | 100    |
| 1 (180)                    | 100               | 100    | 3,5               | 12     | 100               | 100    | 40.5              | 47     | 100  | 100  | 100      | 92           | 93     |
| 1 (308)                    | 100               | 100    | 0                 | 0      | 100               | 100    | 20                | 33     | 100  | 100  | 100      | 63           | 75     |
| 1 (344)                    | 100               | 100    | 0                 | 0      | 100               | 100    | 38.5              | 37.5   | 100  | 100  | 100      | 41           | 41     |
| 1 (360)                    | 100               | 100    | 5                 | 0      | 100               | 100    | 34.5              | 37.5   | 98   | 100  | 100      | 60           | 70     |
| 1 (394)                    | 100               | 100    | 0                 | 6      | 100               | 100    | 12                | 24.5   | 100  | 100  | 100      | 28           | 38     |
| 1 (421)                    | 96                | 100    | 5                 | 1.5    | 100               | 100    | 23.5              | 0      | 100  | 100  | 100      | 42           | n.a.   |
| 1 (426)                    | 100               | 96.5   | 4                 | 2      | 100               | 100    | 29                | 12     | 93   | 100  | 100      | 48           | n.a.   |
| 2 (205)                    | 98.5              | 100    | 0                 | 0      | 100               | 98     | 87                | 36.5   | 95   | 100  | 100      | 74           | 67,5   |
| 2 (224)                    | 98                | 100    | 0                 | 0      | 100               | 96     | 85                | 95     | 100  | 100  | 100      | 72           | 75     |
| 2 (228)                    | 100               | 100    | 13,5              | 15     | 100               | 100    | 100               | 100    | 100  | 100  | 100      | 100          | 90     |
| 2 (236)                    | 100               | 100    | 0                 | 0      | 100               | 100    | 83                | 73     | 100  | 100  | 100      | 75           | 66     |
| 2 (298)                    | 98.5              | 100    | 0                 | 0      | 100               | 100    | 69.5              | 50     | 93.5 | 100  | 100      | 64           | 43     |
| 2 (368)                    | 100               | 100    | 0                 | 3.5    | 100               | 100    | 64                | 47     | 91.5 | 100  | 100      | 39           | 50     |
| 3 ( 93)                    | 100               | 98     | 57                | 79.5   | 100               | 100    | 85                | 100    | 100  | 100  | 92.5     | 100          | n.a.   |
| 3 (170)                    | 100               | 100    | 50                | 100    | 100               | 100    | 100               | 100    | 100  | 100  | 100      | 100          | 100    |
| 3 (173)                    | 100               | 100    | 100               | 100    | 100               | 100    | 92                | 100    | 100  | 100  | 100      | 100          | 100    |
| 3 (176)                    | 100               | 100    | 100               | 100    | 100               | 100    | 100               | 100    | 100  | 100  | 100      | 100          | 100    |
| 3 (281)                    | 100               | 100    | 87                | 91.5   | 100               | 100    | 100               | 100    | 100  | 100  | 100      | 100          | 96     |
| 4 ( 37)                    | n.a.              | n.a.   | n.a.              | n.a.   | 100               | n.a.   | n.a.              | 100    | n.a. | n.a. | 100      | n.a.         | n.a.   |
| 4 ( 69)                    | n.a.              | 100    | n.a.              | 80     | 100               | 100    | 90                | 95     | 95   | 100  | 100      | 100          | 100    |
| 4 (311)                    | 100               | 100    | 100               | 100    | 100               | 100    | 100               | 100    | 100  | 100  | 100      | 100          | 100    |
| 4 (315)                    | 100               | 100    | 100               | 100    | 100               | 100    | 100               | 100    | 100  | 100  | 100      | 100          | 100    |
| 4 (319)                    | 100               | 100    | 100               | 100    | 100               | 100    | 100               | 100    | 100  | 100  | 100      | 100          | 100    |
| 4 (338)                    | 100               | 100    | 75                | 82.5   | 100               | 100    | 100               | 94.5   | 100  | 100  | 100      | 90           | 100    |
| 4 (371)                    | 100               | 100    | 100               | 100    | 100               | 100    | 100               | 97     | 94   | 100  | 100      | 100          | 100    |
