# Supplementary material for: Epigenetic Control of the foxp3 Locus in Regulatory T Cells
Source: PLOS journal article supplement (doi:10.1371/journal.pbio.0050038), 2007-01-26
Supplement: S1 (10.1371/journal.pbio.0050038.s001) [file journal.pbio.0050038.s001]

1 AGGCTGACATTCCAGAGCC-----AGCAAGAGGCCTTATGGAGTTTTAAG 45  
 1 ----tg--tttccag-gcctggttaggcaagaggccctatgaagcagcaag 43

NF/kappaB GATA-4

46 CTCCTGGCTTT-AGGTGGTTCCCATTTCTTTGGGC-TCTGGGACA---- 89  
 44 ctgcctgactttcagatggttccaaggagtttggacaccagggacactgg 93

Foxp3

90 TCAAATACACACAGTAAGAAGGTGGATCCATGCACCCTACAGAGTCTGTGT 139  
 94 cc--tacacatactgagactttgggaccgtagacc--cacagtctgtgg 139

C/EBPgamma TCF-4 C/EBPgamma

140 TCTTGAGATTCTAAAAATCGTTGGCTTTGAGAAATGATATCGTACAGTTC 189  
 140 ttttgagattctaggatcctttaaatctaagaatgctgttctatgatcc 189

TF1/TCF-4

190 TGAGTTTCTGTACTACAGCATTGAAGACTCAAGGGGGTCTCAATATCC 239  
 190 tgaggtcctggtgttatactattgaagacc--ggggtcccagtatct 238

240 ATGAGGCCTGCCTAATACTCACCAAGCATCCAACCTTGGGCCCTCTGGC 289  
 239 gtggagcctgctggcactctcagagcttcaaacctgggtcctctccaca 288

290 ATCCAAGAA-AGACAGAATCGATAGAACTTGGGTTTTG-CATGGTAGCCA 337  
 289 acccaagaaggccag-gtcttcagagctagggcttgtcatagtggcca 337

GATA-4 ATF/CREB c-Ets-1

338 GATGGAAGTCATCTACCACATCCGTAGCACCACATCACCTACCTGGG 387  
 338 gatggacatcacctaccacatccaccagcaccatgtcaccaccctggg 387

NF-kappaB STAT-1

388 CCTATCCGGCTACAGGATAGACTAGCCACTTCTCGGAAAGAAACCTGTGG 437  
 388 ccaagcctgctgcaggacagggcagccagttctcggaacgaaacctgtgg 437

438 GGTAGATTATCTGCCCCCTTCTTCTCCTCCTTGTGCGATGAAGCCCAA 487  
 438 ggtggggtatctgcctcttctcttctcctcgggtgtcgatgaagccgg 487

c-Ets-1 CREB/ATF

488 TGCATCCGTCGCGCAATGACGTCAAATGGCAGAAAAATCTGGCCAAGTTC-- 535  
 488 cgcatccggccgcatgacgtaaatggcgaaaaatctgggcaag-tcgg 536

Foxp3 NFAT/Evi-1

536 AGGTTGTGACAACAGGGCCAGATGTAGACCCGATAGCAAAACATATTC 585  
 537 gggctgtgacaacagggccagatgcagacccgatatgaaaacataatc 586

586 TATGTCCCAGAAAACAACCTCCATACAGCTTCTAAGAAA--CAGTCAAACA 633  
 587 tgtgtcccagaaaacatccccattcagcttctgagaaaccagtcagaaa 636

Elk-1 SMAD-4

634 GGAAAGCCCCAACAGACAGTGCAGGAAAGCTGGCTGGCCAGCCAGCCCTC 683  
 637 ggaacgctcccaacagacagtgcaagagcggtgcccagcccgccctc 686

SMAD-4

684 CAGGTCC-CTAGTACCACTAGACAGACATATCCAATTCAGG-- 724  
 687 taggtcctc---taccaccagacagatcatctccatgtccctgt 727

Supplementary Figure 1
